# Supplementary material
Source: PubMed Central journal article supplement (PMC10035535)
Supplement: crc-22-0298-s01.pdf [file crc-22-0298-s01.pdf]

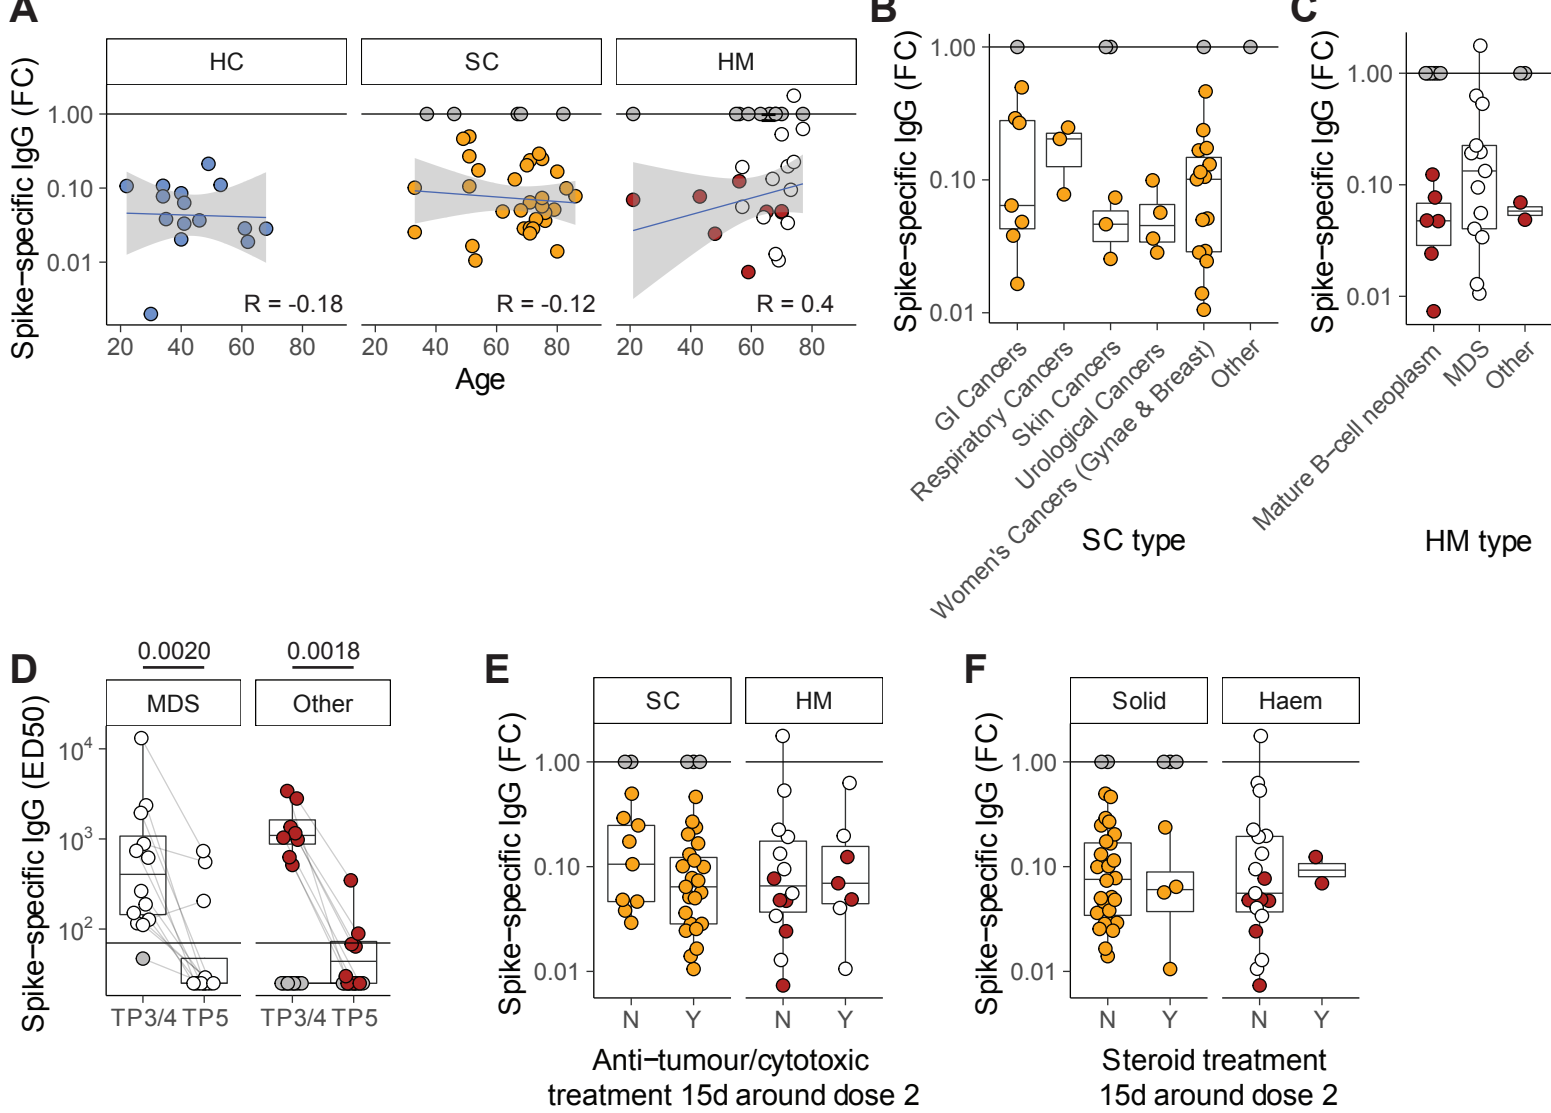

Supplementary Figure 1
