# Supplementary material
Source: PubMed Central journal article supplement (PMC10035535)

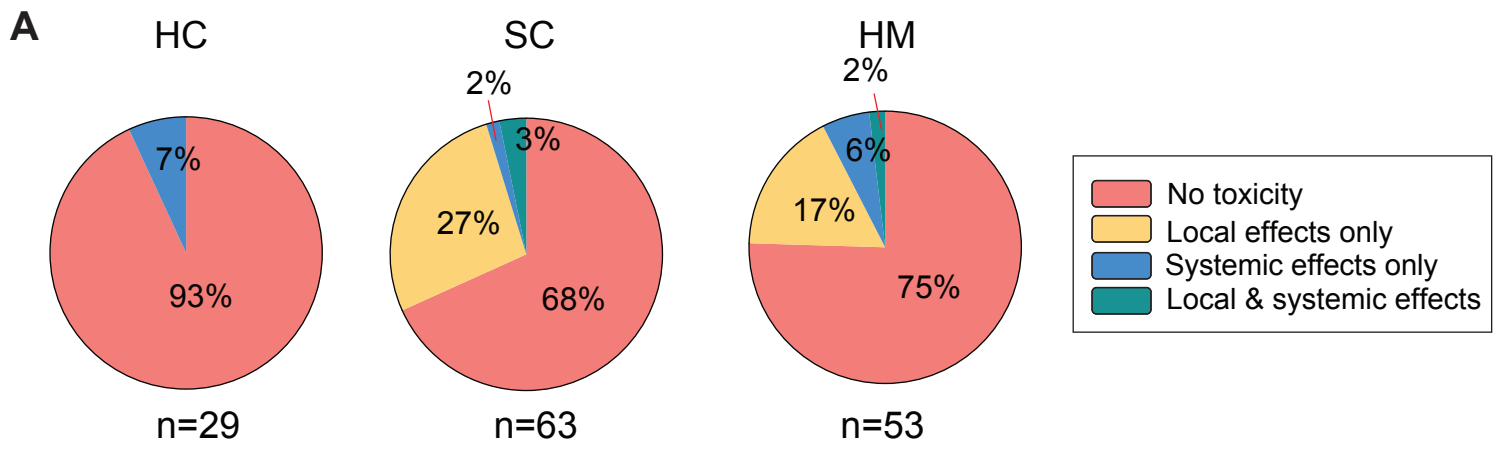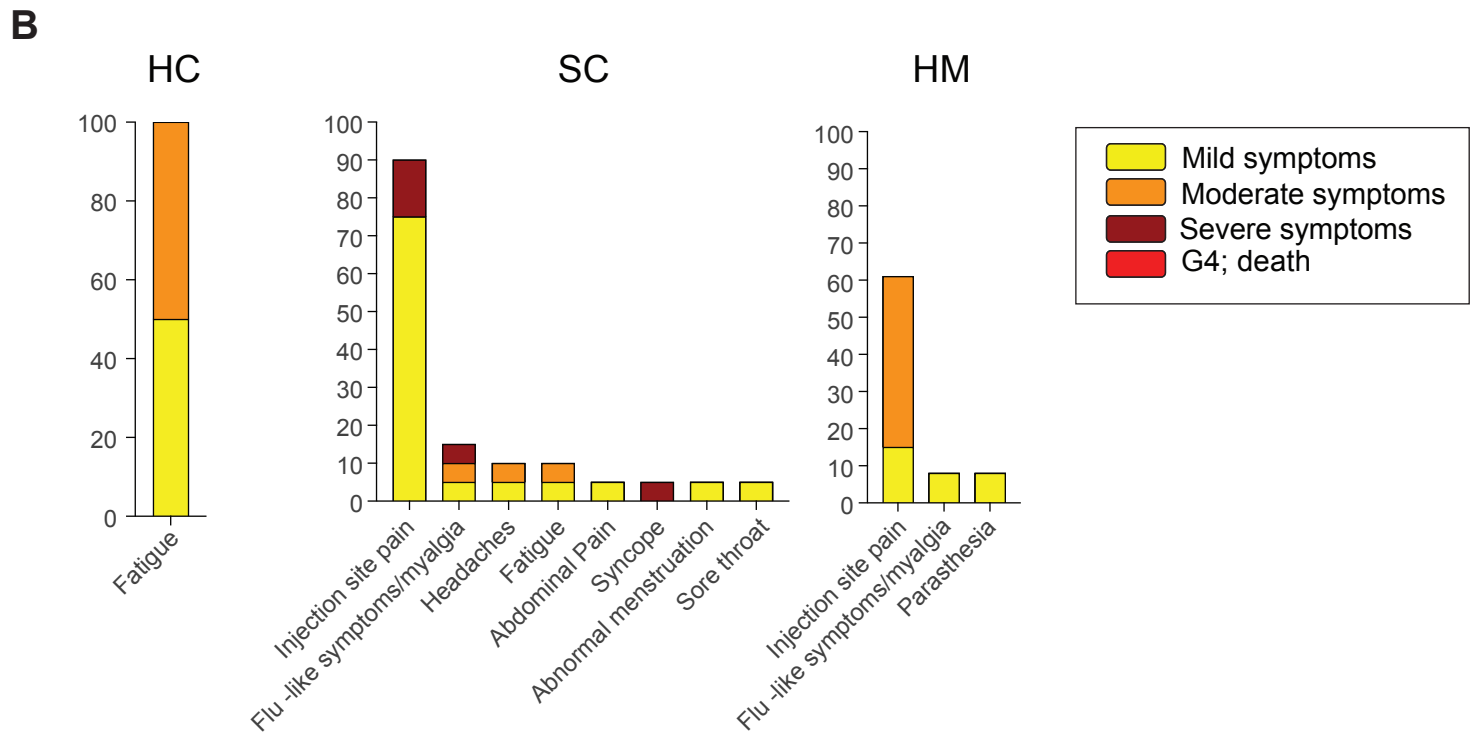

Supplement: crc-22-0298-s04.pdf [file crc-22-0298-s04.pdf]
